# Supplementary material for: Catalytic treatment of crude algal bio-oil in supercritical water: optimization studies
Source: Royal Society of Chemistry journal article supplement (doi:10.1039/c0ee00343c), 2011-01-01
Supplement: c0ee00343c.pdf [file c0ee00343c.pdf]

|       |                                             |      |      |      |      |      |      |      |       |      |       |      |      |
|-------|---------------------------------------------|------|------|------|------|------|------|------|-------|------|-------|------|------|
| 19.04 | Hexadecane                                  |      | 1.35 | 1.96 | 1.69 |      |      | 0.25 |       |      |       | 1.90 |      |
| 19.06 | 2,3-Dihydro-4,6-dimethyl-1H-indene          |      |      |      |      | 0.56 | 0.40 | 0.63 |       |      |       |      |      |
| 19.23 | 1,2,3,4-Tetrahydro-6-methyl-naphthalene     |      | 0.15 | 0.22 | 0.25 | 0.15 |      | 0.18 |       |      |       |      |      |
| 19.77 | 2,6,10-Trimethyl-pentadecane                |      | 0.42 | 0.41 | 0.34 |      |      |      |       |      |       | 0.38 |      |
| 20.00 | 2,3-Dihydro-4,7-dimethyl-1H-indene          |      | 0.33 | 0.38 | 0.36 | 0.51 | 0.38 | 0.57 |       |      |       | 0.27 |      |
| 20.29 | 1-Methyl-2-pyrrolidinone                    | 1.26 |      |      |      |      |      |      |       |      |       |      |      |
| 20.70 | 2,3-Dihydro-1,1,3-trimethyl-1H-indene       |      | 0.29 | 0.29 | 0.28 | 0.21 |      | 0.26 |       |      |       |      |      |
| 20.78 | 1,5-Dimethyl-2-pyrrolidinone                | 0.12 |      |      |      |      |      |      |       |      |       |      |      |
| 20.99 | 1,2,3,4-Tetrahydro-6,7-dimethyl-naphthalene | 0.22 | 0.42 | 0.48 | 0.28 | 0.27 | 0.22 | 0.28 |       |      |       | 0.50 |      |
| 21.23 | 2,6,10,14-Tetramethyl-pentadecane           |      | 0.58 | 0.53 | 0.44 |      |      |      |       |      |       | 0.66 |      |
| 21.21 | 1-Ethyl-2-pyrrolidinone                     | 1.00 |      |      |      |      |      |      |       |      |       |      |      |
| 21.39 | 2,4,6-Trimethyl-indene                      |      |      |      |      | 0.51 | 0.33 | 0.64 |       |      |       |      |      |
| 21.85 | Heptadecane                                 | 0.26 | 2.14 | 2.79 | 2.23 |      |      |      |       |      |       | 3.18 |      |
| 22.32 | Naphthalene                                 |      | 0.24 | 0.33 | 0.56 | 2.55 | 3.58 | 1.73 | 17.33 | 6.58 | 13.21 | 0.33 | 9.13 |
| 23.41 | 4-Methyl-pyridine                           | 0.27 | 0.07 | 0.24 | 0.32 | 1.07 | 0.94 | 0.67 | 1.09  | 1.45 | 1.13  |      | 0.99 |
| 23.68 | 5-Ethyl-1-nonene                            | 0.17 |      |      |      |      |      |      |       |      |       |      |      |
| 23.89 | (1-Ethyl-1-propenyl)-dimethyl-amine         | 0.20 |      |      |      |      |      |      |       |      |       |      |      |
| 24.00 | 1-Ethyl-6-methyl-3-piperidinone             | 0.62 |      |      |      |      |      |      |       |      |       |      |      |
| 24.19 | 2,6,10,14-Tetramethyl-hexadecane            | 1.00 | 1.30 | 1.01 | 0.59 |      |      |      |       |      |       | 1.54 |      |
| 24.67 | 2-Methyl-benzylamine                        |      |      | 0.42 | 0.57 | 0.86 | 0.57 | 0.73 |       | 0.33 |       |      |      |
| 24.74 | Octadecane                                  |      | 0.88 | 0.77 | 0.68 |      |      |      |       |      |       | 1.35 |      |
| 25.37 | 2-Methyl-naphthalene                        |      | 0.40 | 0.55 | 0.83 | 3.39 | 4.97 | 3.02 | 5.01  | 6.49 | 7.44  | 0.59 | 8.87 |
| 25.66 | 2-Phytene isomer                            | 0.39 |      |      |      |      |      |      |       |      |       |      |      |
| 25.88 | 3-Methyl-benzylamine                        |      | 0.46 | 0.65 | 0.78 | 0.66 | 0.35 | 0.56 |       |      |       |      |      |
| 25.96 | 2-Phytene isomer                            | 0.53 |      |      |      |      |      |      |       |      |       |      |      |
| 26.19 | 2-Phytene isomer                            | 0.40 |      |      |      |      |      |      |       |      |       |      |      |
| 26.29 | 1-methyl-naphthalene                        |      | 0.42 | 0.62 | 0.28 | 2.24 | 2.13 | 1.96 | 0.98  | 2.12 | 1.81  | 0.61 | 2.35 |
| 26.64 | 2-Phytene isomer                            | 0.67 |      |      |      |      |      |      |       |      |       |      |      |
| 27.28 | 1-Methyl-piperidine                         | 1.22 |      |      |      |      |      |      |       |      |       |      |      |
| 27.42 | Nonadecane                                  |      | 0.59 | 0.69 | 0.80 |      |      |      |       |      |       | 0.98 |      |
| 27.52 | Isoquinoline                                |      | 0.19 |      | 0.15 | 0.65 | 0.87 | 0.34 |       | 1.27 | 0.70  | 0.22 | 1.15 |
| 27.88 | 1-Ethyl-naphthalene                         |      |      | 0.23 | 0.41 | 1.56 | 2.13 | 1.43 | 1.56  | 2.34 | 2.45  | 0.25 | 3.03 |
| 28.17 | 2-Ethyl-naphthalene                         |      | 0.08 | 0.18 | 0.24 | 0.51 | 0.54 | 0.59 | 0.34  | 0.45 | 0.45  | 0.23 | 0.29 |
| 28.26 | 1,6-Dimethyl-naphthalene                    |      | 0.14 | 0.35 | 0.54 | 1.41 | 1.96 | 1.27 | 0.24  | 1.62 | 0.67  | 0.33 | 1.52 |
| 28.35 | 2-Methyl-quinoline                          |      |      |      |      | 0.83 | 0.64 | 0.72 |       | 0.42 |       |      |      |
| 28.98 | 2-(1-Methylethyl)-naphthalene               |      |      |      |      | 0.17 | 0.20 |      |       |      |       |      |      |
| 29.05 | 2,6-Dimethyl-naphthalene                    |      |      |      |      | 0.63 | 0.74 | 0.75 | 2.04  | 0.77 | 0.61  |      |      |
| 29.19 | 2,7-Dimethyl-naphthalene                    |      | 0.20 | 0.34 | 0.59 | 1.59 | 0.91 | 1.61 |       | 0.49 |       | 0.31 |      |
| 29.96 | Eicosane                                    |      | 0.67 | 0.69 | 0.90 |      |      |      |       |      |       | 1.00 |      |
| 30.14 | Phenol                                      | 0.60 | 1.16 | 1.34 | 1.55 | 3.41 | 3.35 | 3.59 | 1.13  | 3.20 | 2.13  | 1.41 | 2.75 |
| 30.31 | 2-Pyrrolidinone                             | 0.25 |      |      |      |      |      |      |       |      |       |      |      |
| 30.54 | 8-Methyl-quinoline                          |      | 0.21 | 0.26 | 0.39 | 0.83 | 0.88 | 0.66 |       |      |       | 0.35 |      |
| 30.65 | 1,4,6-Trimethyl-naphthalene                 |      |      |      |      | 0.82 | 1.16 | 0.72 |       |      |       |      | 1.14 |
| 30.79 | 1,5-Dimethyl-naphthalene                    |      |      |      |      | 0.39 | 0.33 | 0.51 |       |      |       |      |      |
| 31.01 | 4,6,8-Trimethyl-azulene                     |      |      |      |      | 0.54 | 0.48 | 0.65 |       |      |       |      |      |
| 31.20 | 2,6-Dimethyl-quinoline                      |      |      |      |      | 0.48 | 0.38 | 0.48 |       |      |       |      |      |
| 31.46 | 1,6,7-Trimethyl-naphthalene                 |      |      |      |      | 0.37 | 0.35 | 0.40 |       |      |       |      |      |
| 31.56 | 2,3,6-Trimethyl-naphthalene                 |      |      |      |      | 0.34 | 0.33 | 0.35 |       |      |       |      |      |
| 31.52 | Octanoic acid                               | 0.20 | 0.49 | 0.49 | 0.35 |      |      |      |       |      |       | 0.35 |      |
| 31.76 | 4-Methyl-1,1'-biphenyl                      |      |      |      |      |      |      |      | 0.78  | 0.39 | 0.56  |      |      |
| 31.77 | 4-Methyl-quinoline                          | 0.17 |      |      |      | 0.36 | 0.33 |      |       |      |       | 0.17 |      |
| 31.87 | 2,3-Dimethyl-phenol                         | 0.14 | 0.56 | 0.71 | 0.75 | 0.54 | 0.43 | 1.02 |       |      |       | 0.72 |      |
| 31.95 | 2,3,6-Trimethyl-naphthalene                 |      | 0.15 | 0.24 | 0.36 | 0.62 | 0.56 | 0.80 |       |      |       |      |      |
| 32.04 | 4-Methyl-phenol                             | 0.62 | 0.86 | 0.84 | 0.84 | 1.03 | 0.91 | 1.47 | 0.27  | 0.58 | 0.31  | 0.95 | 0.92 |
| 32.21 | 3-Methyl-phenol                             |      |      |      |      | 0.97 | 1.05 | 1.02 |       | 0.84 |       |      |      |
| 32.43 | Heneicosane                                 |      | 0.44 | 0.59 | 0.57 |      |      |      |       |      |       | 0.66 |      |
| 32.51 | 1,2-Dihydro-acenaphthylene                  | 0.48 | 0.48 | 0.56 | 0.61 | 1.01 | 0.90 | 1.13 | 0.32  | 0.68 | 0.70  | 0.64 | 0.81 |
| 32.79 | 1,4,6-Trimethyl-naphthalene                 |      | 0.16 | 0.24 | 0.40 | 0.78 | 0.77 | 0.83 |       |      |       |      |      |
| 32.87 | 6,10,14-Trimethyl-2-pentadecane             | 0.35 |      |      |      |      |      |      |       |      |       |      |      |
| 32.94 | 7-Ethyl-1,4-dimethyl-azulene                |      |      |      |      | 0.33 | 0.38 | 0.35 |       |      |       |      |      |
| 33.42 | 5,8-Dimethyl-quinoline                      | 0.23 | 0.67 | 0.78 | 0.88 | 0.47 |      | 0.35 |       |      |       | 0.83 |      |
| 33.50 | 2,3,5-Trimethyl-naphthalene                 |      |      |      |      | 0.55 | 1.30 | 0.42 |       |      |       |      |      |



|                          |                                |       |       |       |       |       |       |       |       |       |       |       |       |
|--------------------------|--------------------------------|-------|-------|-------|-------|-------|-------|-------|-------|-------|-------|-------|-------|
| 60.32                    | Nonacosane                     |       | 1.41  | 1.73  | 0.83  |       |       |       |       | 1.08  |       | 1.66  |       |
| 61.49                    | O-methylxime                   | 0.98  |       |       |       |       |       |       |       |       |       |       |       |
| 61.78                    | Heptadecanoic acid             | 0.19  |       |       |       |       |       |       |       |       |       |       |       |
| 62.40                    | Coprostane                     | 1.20  | 0.89  | 0.78  | 0.45  |       |       |       |       |       |       | 1.18  |       |
| 62.84                    | N-Butyl-octadecnamide          | 1.05  |       |       |       |       |       |       |       |       |       |       |       |
| 65.82                    | Cholestane                     | 2.43  | 1.12  | 0.82  | 0.34  |       |       |       |       |       |       | 1.50  |       |
| 67.13                    | Fluoranthene                   |       |       |       |       |       |       |       | 1.72  | 0.65  | 1.24  |       |       |
| 68.37                    | Triacotane                     |       | 0.77  | 1.13  | 0.42  |       |       |       |       |       |       | 1.55  |       |
| 68.61                    | Cholest-4-ene                  | 1.60  |       |       |       |       |       |       |       |       |       |       |       |
| 70.11                    | Cholest-5-ene                  | 1.01  |       |       |       |       |       |       |       |       |       |       |       |
| 71.41                    | Stearic acid                   | 5.41  | 2.52  | 0.98  | 1.03  |       |       |       |       |       |       |       |       |
| 74.10                    | Oleic acid                     | 5.18  |       |       |       |       |       |       |       |       |       |       |       |
| 74.63                    | Pyrene                         |       | 3.82  | 2.73  | 2.12  | 0.91  | 0.92  | 2.31  | 6.48  | 3.84  | 5.58  |       | 4.95  |
| 78.53                    | Palmitamide                    | 1.67  | 3.83  | 2.73  | 2.12  |       |       |       |       |       |       | 4.22  |       |
| 79.54                    | Dotriacontane                  |       | 2.77  | 2.03  | 1.50  |       |       |       |       |       |       | 3.38  |       |
| 79.61                    | 9-Methyl-1,8-dixylylanthracene | 0.71  |       |       |       |       |       |       |       |       |       |       |       |
| 81.48                    | 1-(1-Oxeptadecyl)-pyrrolidine  | 0.95  |       |       |       |       |       |       |       |       |       |       |       |
| 85.31                    | Stigmastane                    | 1.04  |       |       |       |       |       |       |       |       |       |       |       |
| 86.00                    | 5H-Indeno[1,2-b] pyridine      |       |       |       |       | 2.09  | 1.42  | 1.69  | 8.08  | 4.91  | 6.75  |       | 4.46  |
| Fatty acid               |                                | 55.37 | 26.22 | 16.12 | 14.62 | 0.48  | 0     | 0     | 0     | 0     | 0     | 11.1  | 0     |
| Saturated hydrocarbons   |                                | 6.44  | 33.54 | 41.39 | 32.39 | 1.07  | 0.41  | 2.93  | 0     | 4.98  | 0     | 42.46 | 0     |
| Unsaturated hydrocarbons |                                | 5.22  | 0.47  | 0.49  | 0.52  | 0     | 0     | 0     | 0     | 0     | 0     | 0.79  | 0     |
| Aromatic compounds       |                                | 7.59  | 27.1  | 32.65 | 35.6  | 90.24 | 89.99 | 88.82 | 97.17 | 87.69 | 96.97 | 17.83 | 98.68 |
| N-containing compounds   |                                | 12.02 | 12.91 | 12.74 | 11.21 | 13.62 | 11.21 | 8.42  | 9.17  | 9.36  | 8.58  | 15.48 | 6.6   |
| O-containing compounds   |                                | 66.65 | 36.63 | 25.51 | 23.83 | 10.48 | 10.45 | 10.08 | 2.08  | 6.37  | 3.04  | 21.88 | 4.5   |
| N,O-containing compounds |                                | 72.82 | 45.28 | 35.52 | 32.92 | 24.1  | 21.66 | 18.5  | 11.25 | 15.73 | 11.62 | 32.69 | 11.1  |

\*not detected
